# Supplementary material for: Altered N6-Methyladenosine Modification Patterns and Transcript Profiles Contributes to Cognitive Dysfunction in High-Fat Induced Diabetic Mice
Source: MDPI journal article supplement (doi:10.3390/ijms25041990), 2024-02-06
Supplement: s1 [file s1]

**Table S1.** Primers used in this study

| <b>Gene</b>    | <b>Primer type</b> | <b>Primer Sequence (5'-3')</b> |
|----------------|--------------------|--------------------------------|
| <i>FTO</i>     | Forward            | GACACTTGGCTTCCTTACCTG          |
| <i>FTO</i>     | Reward             | CTCACCACGTCCCGAAACAA           |
| <i>METTL3</i>  | Forward            | CTGGGCACTTGGATTTAAGGAA         |
| <i>METTL3</i>  | Reward             | TGAGAGGTGGTGTAGCAACTT          |
| <i>METTL14</i> | Forward            | CTCCAAACTCAAAACGGAAGTGT        |
| <i>METTL14</i> | Reward             | ATGGGGATTTAAGCTCTGCGT          |
